# Supplementary material for: Preparation, Characterization, and In Vivo Evaluation of an Oral Multiple Nanoemulsive System for Co-Delivery of Pemetrexed and Quercetin
Source: Pharmaceutics. 2018 Sep 12;10(3):158. doi: 10.3390/pharmaceutics10030158 (PMC6161295; doi:10.3390/pharmaceutics10030158)
Supplement: Supplementary file 1 [file pharmaceutics-10-00158-s001.pdf]

## Supplemental Material

(A)

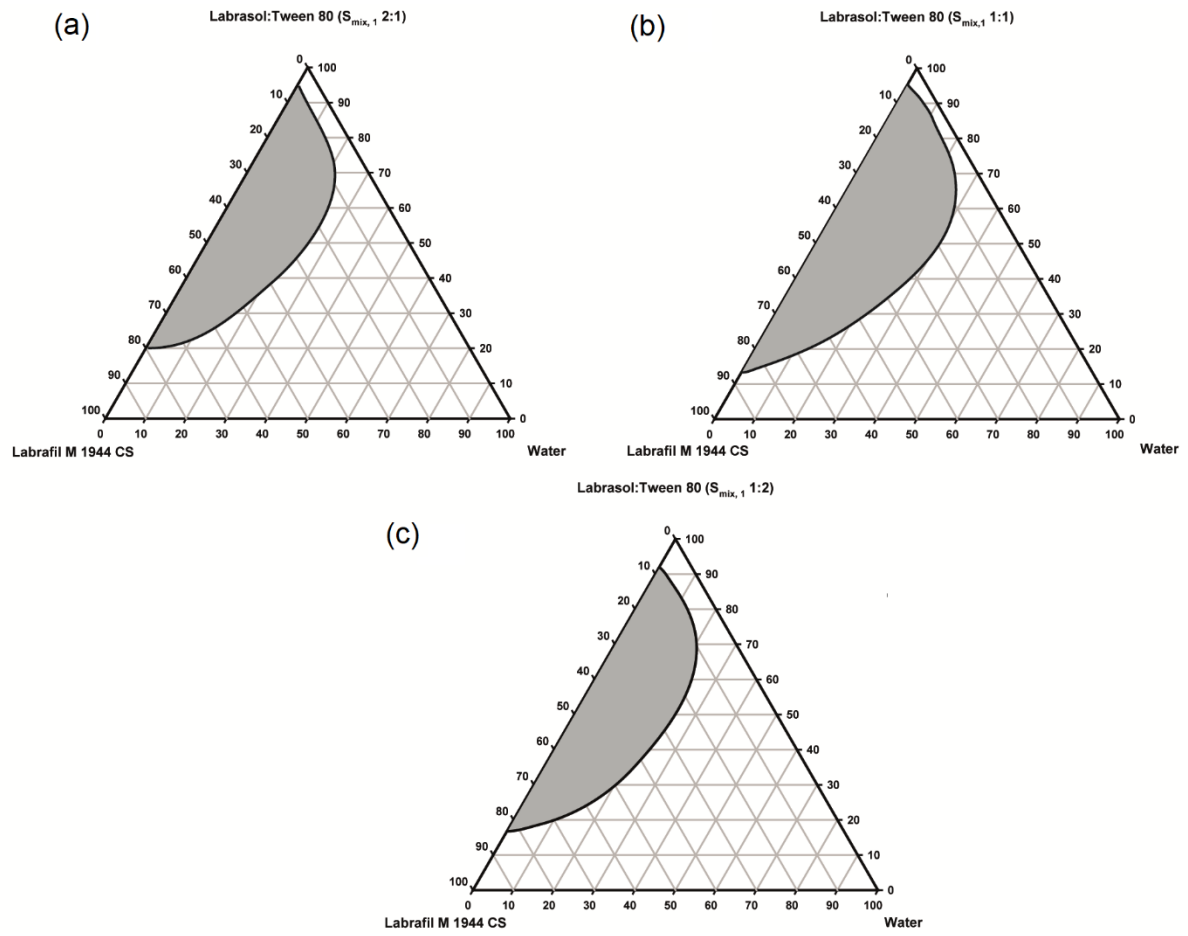

(B)

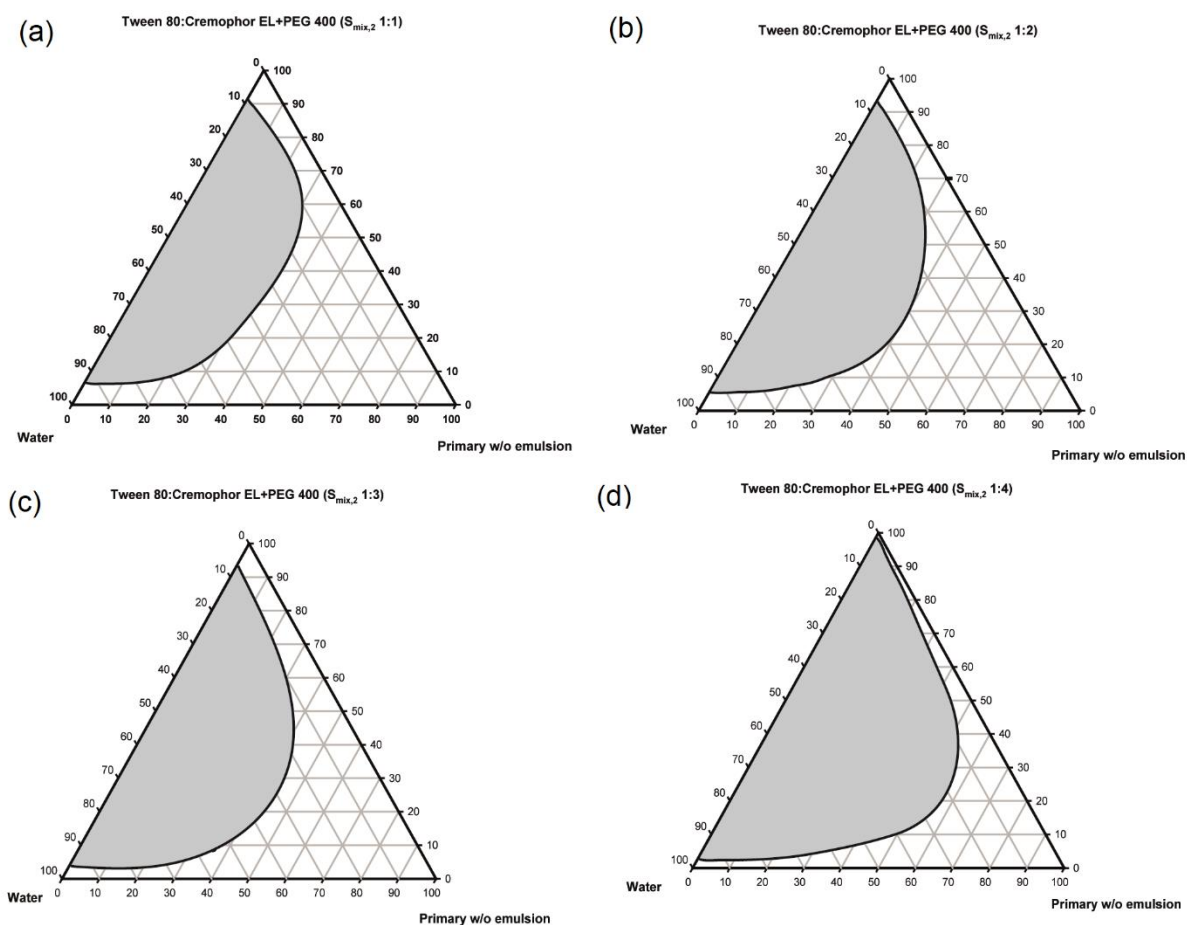

**Figure S1.** (A) Pseudo-ternary phase diagrams of water-in-oil (w/o) nanoemulsion (primary nanoemulsion) region using Labrafil M 1944 CS (oil phase), water (aqueous phase), Labrasol (surfactant), and Tween 80 (co-surfactant) with a different mixture of surfactant and co-surfactant ( $S_{mix,1}$ ) ratio of (a)  $S_{mix,1}$  2:1, (b)  $S_{mix,1}$  1:1, and (c)  $S_{mix,1}$  1:2. (B) Pseudo-ternary phase diagrams of water-in-oil-in-water (w/o/w) nanoemulsion region using primary nanoemulsion (oil phase), Tween 80 (surfactant), a mixture of Cremophor EL and PEG 400 (1.13:1, w/w; co-surfactants), and water with a different mixture of surfactant and co-surfactants ( $S_{mix,2}$ ) ratio of (a)  $S_{mix,2}$  1:1, (b)  $S_{mix,2}$  1:2, (c)  $S_{mix,2}$  1:3, and (d)  $S_{mix,2}$  1:4.
